# Supplementary material for: Spin trapping and flipping in FeCO through relativistic electron dynamics
Source: Royal Society of Chemistry journal article supplement (doi:10.1039/c8cp06583g), 2018-12-19
Supplement: c8cp06583g1.pdf [file c8cp06583g1.pdf]

# Supporting Information for *Spin trapping and flipping in FeCO through relativistic electron dynamics*

Inga S. Ulusoy<sup>1</sup> and Angela K. Wilson<sup>1</sup>

<sup>1</sup>*Department of Chemistry, Michigan State University,  
578 S Shaw Lane, East Lansing MI 48824-1322, USA*

*ulusoyin@chemistry.msu.edu*

*akwilson@chemistry.msu.edu*

December 17, 2018

## 1 Bonding in FeCO

The MOs and populations for the triplet ground and lowest-lying quintet state are shown in Fig. 1. In the triplet ground state, the  $11\sigma$  and  $1\delta$  MOs are populated, but not the antibonding  $12\sigma$  MO. In the lowest-lying quintet state, the antibonding  $12\sigma$  is populated, leading to a weakening of the metal-ligand bonding and a reduced dipole moment.

In Fig. 2, the optically accessible electronic excited states starting from the lowest-lying singlet state  $S_0$  are illustrated. The energy difference is represented on the y-axis relative to the triplet ground state, and the magnitude of the transition dipole moment, which dictates the coupling between initial and final state, is represented through the size of the circles. The accessible excited states are classified according to their spin multiplicity by different colors.

The dominant electron configurations in the LS  $X^3\Sigma$  ground and HS target state  $^5\Pi$  state are shown in Fig. 3. In the LS state, the  $1\delta$  MOs both contain one unpaired electron, while the HS target state is a superposition of excitations from the  $x$  and  $y$   $4\pi$  orbitals into the antibonding  $12\sigma$  MO. The occupancy of the relevant MOs during a 2 fs propagation without a laser pulse in the  $X^3\Sigma$  and  $^5\Pi$  electronic states (Fig. 4) confirms the above configurations as the major contributions to the electronic states.

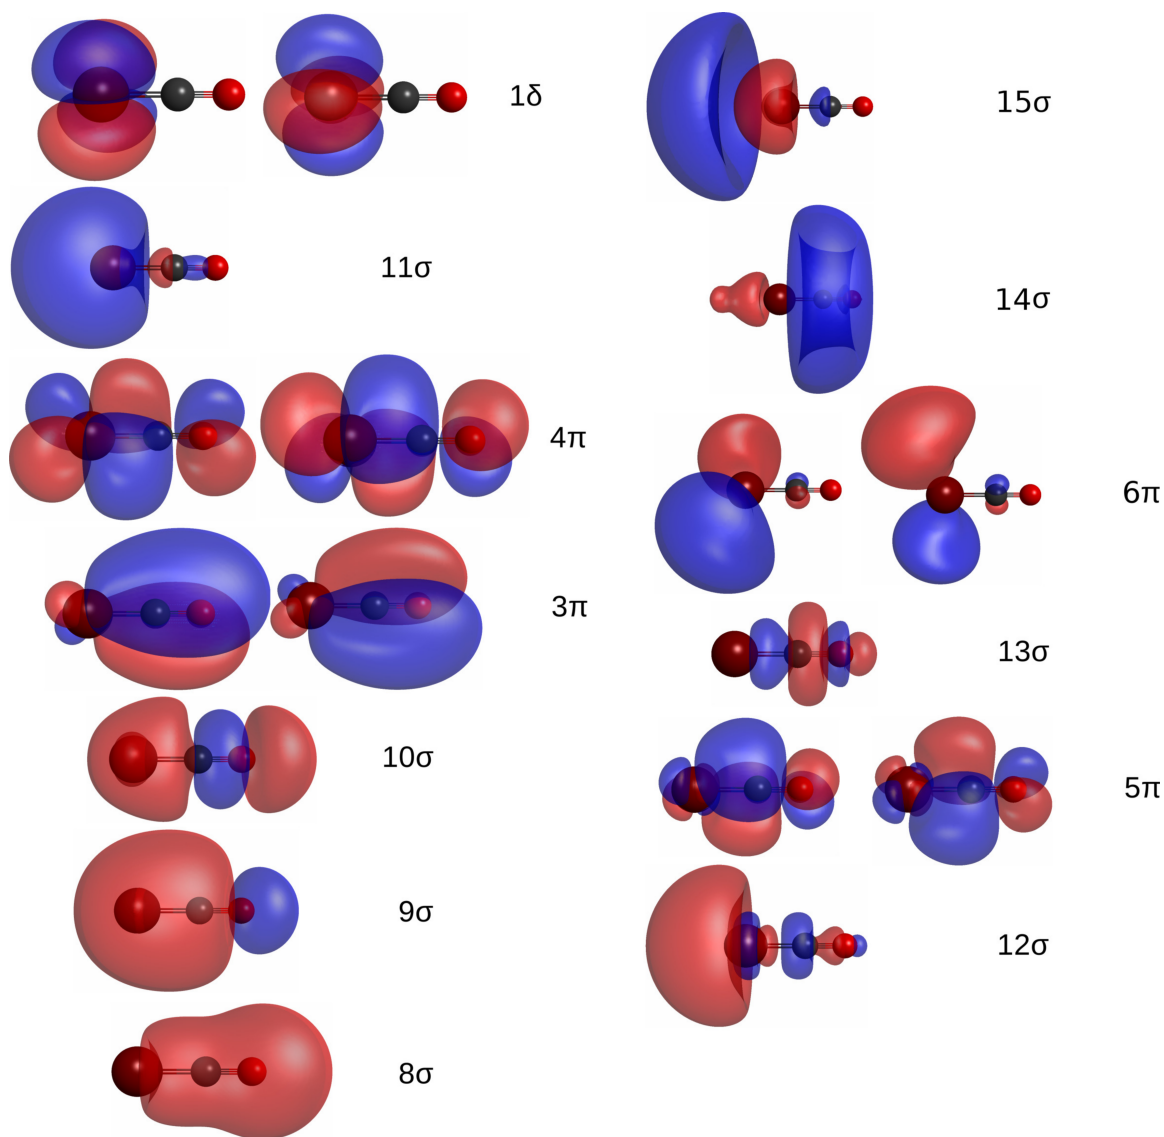

**Figure 1** MOs in the active space. The  $10\sigma$  MO is involved in the  $\sigma$ -donation from the CO ligand to Fe, while the  $3\pi$  and  $4\pi$  MOs are involved in the back-donation from Fe to the CO ligand. In the triplet ground state, all MOs up to  $11\sigma$  are doubly occupied, and the two  $1\delta$  MOs contain the two uncoupled electrons. In the lowest-lying quintet state, one electron is removed from the  $11\sigma$  MO and instead resides in the  $12\sigma$  MO. A large variety of transitions between  $3\pi$  ( $4\pi$ ) and  $1\delta$ , as well as involving the virtual  $\pi$  MOs and the  $\sigma$  MOs are possible.

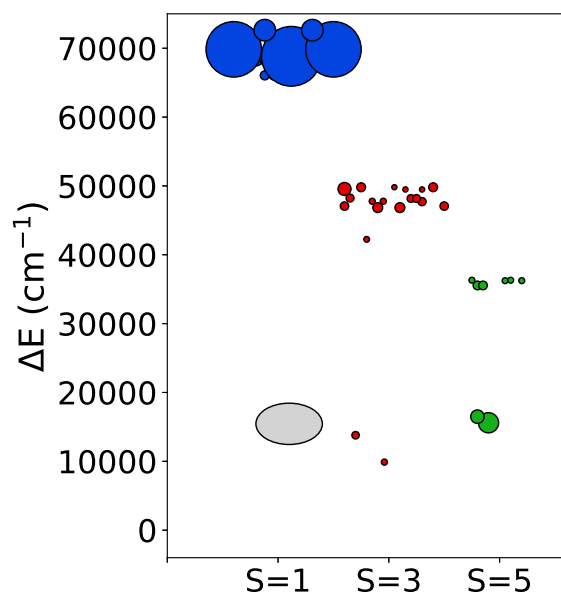

**Figure 2** Electronic excitations out of the lowest-lying singlet state  $S_0$  that can be induced optically. The initial state is marked with grey, while the accessible excited states are classified according to their spin multiplicity (blue – singlet, red – triplet, green – quintet), and the magnitude of the transition dipole moment is reflected through the size of the circles. The y-axis corresponds to the relative energy of the electronic states with respect to the triplet ground state.

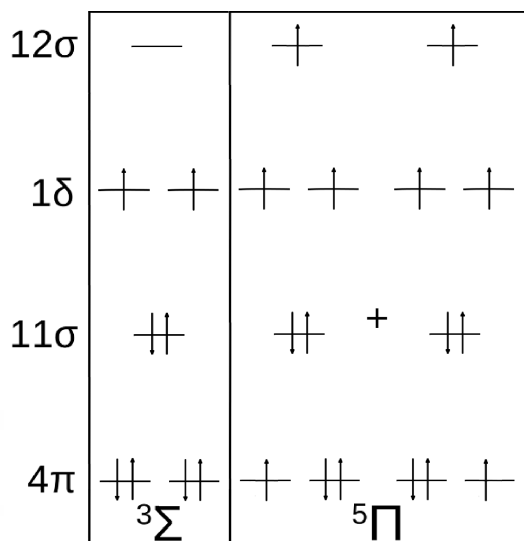

**Figure 3** Dominant electronic configurations in the LS  $X^3\Sigma$  ground and HS  $^5\Pi$  target state. In the  $^5\Pi$  state  $\leftarrow X^3\Sigma$  transition, an electron from the  $4\pi$  MOs is excited into the antibonding  $12\sigma$  MO and undergoes a spin flip.

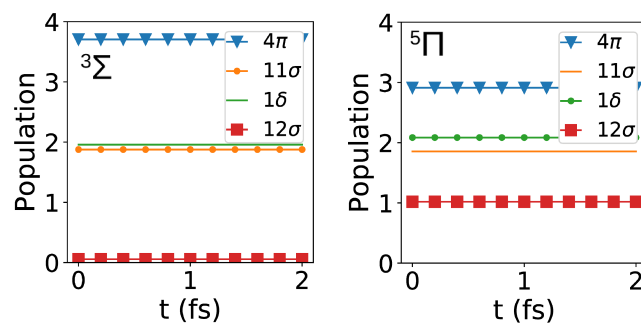

**Figure 4** SO occupancies in the LS  $X^3\Sigma$  ground and HS  $^5\Pi$  target state. In the LS state, two unpaired electrons reside in the  $1\delta$  MOs, while in the HS state, one electron is excited from the  $4\pi$  to the  $12\sigma$  MO and undergoes a spin flip, leading to four unpaired electrons with same spin.
